# Supplementary material
Source: PubMed Central journal article supplement (PMC5792299)
Supplement: NIHMS911372-supplement-supplement_1.pdf [file NIHMS911372-supplement-supplement_1.pdf]

Supplementary Table 1. Absolute dense breast area and non-dense breast area (least square means and their 95% confidence intervals) by alcohol consumption during different age intervals among premenopausal women.

| Alcohol intake              | No  | Square root-transformed dense area |                          | Square root-transformed non-dense area |                          |
|-----------------------------|-----|------------------------------------|--------------------------|----------------------------------------|--------------------------|
|                             |     | Model 1 <sup>†</sup>               | Model 2 <sup>‡</sup>     | Model 1 <sup>†</sup>                   | Model 2 <sup>‡</sup>     |
| Ages 15-17, g/day           |     |                                    |                          |                                        |                          |
| 0                           | 942 | 9.4 (9.3, 9.6)                     | 9.4 (8.9, 9.9)           | 11.7 (11.6, 11.9)                      | 11.4 (10.9, 11.8)        |
| >0 - <5                     | 159 | 9.0 (8.6, 9.3)                     | 8.9 (8.4, 9.5)           | 11.9 (11.6, 12.3)                      | 11.6 (11.1, 12.1)        |
| ≥5                          | 110 | 9.4 (8.9, 9.9)                     | 9.4 (8.7, 10.1)          | 12.0 (11.5, 12.4)                      | 11.6 (11.0, 12.2)        |
|                             |     | P <sub>trend</sub> =0.99           | P <sub>trend</sub> =0.92 | P <sub>trend</sub> =0.28               | P <sub>trend</sub> =0.30 |
| Ages 18-22, g/day           |     |                                    |                          |                                        |                          |
| 0                           | 307 | 9.3 (9.1, 9.6)                     | 9.2 (8.7, 9.8)           | 11.5 (11.2, 11.8)                      | 11.1 (10.6, 11.6)        |
| >0 - <5                     | 385 | 9.4 (9.1, 9.6)                     | 9.3 (8.8, 9.8)           | 11.8 (11.5, 12.0)                      | 11.4 (10.8, 11.9)        |
| ≥5 - <10                    | 394 | 9.3 (9.1, 9.6)                     | 9.3 (8.8, 9.8)           | 12.0 (11.8, 12.2)                      | 11.6 (11.1, 12.1)        |
| ≥10                         | 125 | 9.4 (9.0, 9.9)                     | 9.4 (8.7, 10.0)          | 11.8 (11.4, 12.2)                      | 11.5 (10.9, 12.1)        |
|                             |     | P <sub>trend</sub> =0.81           | P <sub>trend</sub> =0.73 | P <sub>trend</sub> =0.20               | P <sub>trend</sub> =0.10 |
| Ages 23-30, g/day           |     |                                    |                          |                                        |                          |
| 0                           | 280 | 9.2 (8.9, 9.5)                     | 9.2 (8.6, 9.7)           | 11.7 (11.4, 12.0)                      | 11.3 (10.8, 11.9)        |
| >0 - <5                     | 475 | 9.5 (9.3, 9.7)                     | 9.5 (9.0, 10.0)          | 11.8 (11.6, 12.0)                      | 11.4 (10.9, 11.9)        |
| ≥5 - <10                    | 387 | 9.2 (8.9, 9.4)                     | 9.2 (8.7, 9.7)           | 11.8 (11.6, 12.1)                      | 11.5 (11.0, 12.0)        |
| ≥10                         | 69  | 9.7 (9.1, 10.3)                    | 9.6 (8.8, 10.3)          | 11.9 (11.3, 12.4)                      | 11.6 (10.8, 12.3)        |
|                             |     | P <sub>trend</sub> =0.75           | P <sub>trend</sub> =0.88 | P <sub>trend</sub> =0.57               | P <sub>trend</sub> =0.31 |
| Ages 31-at mammogram, g/day |     |                                    |                          |                                        |                          |
| 0                           | 260 | 9.1 (8.8, 9.4)                     | 9.0 (8.5, 9.6)           | 11.7 (11.4, 12.0)                      | 11.4 (10.8, 11.9)        |
| >0 - <5                     | 660 | 9.4 (9.2, 9.6)                     | 9.3 (8.9, 9.8)           | 11.8 (11.6, 11.9)                      | 11.4 (10.9, 11.9)        |
| ≥5 - <10                    | 166 | 9.3 (8.9, 9.6)                     | 9.2 (8.6, 9.8)           | 11.8 (11.5, 12.2)                      | 11.5 (11.0, 12.1)        |
| ≥10                         | 124 | 9.6 (9.1, 10.0)                    | 9.5 (8.8, 10.1)          | 11.8 (11.5, 12.2)                      | 11.5 (10.9, 12.1)        |
|                             |     | P <sub>trend</sub> =0.39           | P <sub>trend</sub> =0.43 | P <sub>trend</sub> =0.66               | P <sub>trend</sub> =0.49 |

<sup>†</sup> adjusted for age (continuous) and BMI (continuous) at mammogram

<sup>‡</sup> further adjusted for parity, breast cancer in first-degree relative(s), benign breast disease, and use of oral contraceptives, all at or close to mammogram, as well as age at menarche, age at first pregnancy, and BMI at age 18

Supplementary Table 2. Absolute dense breast area and non-dense area (least square means and 95% confidence intervals) by cumulative average consumption of alcohol prior to and after first full-term pregnancy<sup>†</sup> among premenopausal women.

| Alcohol intake                | No. of women | Square root-transformed dense area |                          | Square root-transformed non-dense area |                          |
|-------------------------------|--------------|------------------------------------|--------------------------|----------------------------------------|--------------------------|
|                               |              | Model 1 <sup>‡</sup>               | Model 2 <sup>§</sup>     | Model 1 <sup>‡</sup>                   | Model 2 <sup>§</sup>     |
| Before first pregnancy, g/day |              |                                    |                          |                                        |                          |
| 0                             | 187          | 9.4 (9.0, 9.8)                     | 9.5 (8.8, 10.1)          | 11.5 (11.1, 11.9)                      | 11.5 (10.9, 12.0)        |
| >0 - <5                       | 566          | 9.2 (9.0, 9.4)                     | 9.3 (8.8, 9.8)           | 11.9 (11.7, 12.1)                      | 11.9 (11.4, 12.3)        |
| ≥5 - <10                      | 153          | 9.3 (8.8, 9.7)                     | 9.3 (8.7, 9.9)           | 11.9 (11.5, 12.2)                      | 11.9 (11.4, 12.5)        |
| ≥10                           | 80           | 9.8 (9.2, 10.3)                    | 9.8 (9.1, 10.5)          | 11.6 (11.1, 12.1)                      | 11.7 (11.0, 12.3)        |
|                               |              | P <sub>trend</sub> =0.24           | P <sub>trend</sub> =0.26 | P <sub>trend</sub> =0.93               | P <sub>trend</sub> =0.77 |
| After first pregnancy, g/day  |              |                                    |                          |                                        |                          |
| 0                             | 218          | 9.2 (8.9, 9.6)                     | 9.2 (8.6, 9.8)           | 11.7 (11.3, 12.0)                      | 11.7 (11.2, 12.3)        |
| >0 - <5                       | 548          | 9.3 (9.1, 9.5)                     | 9.3 (8.8, 9.8)           | 11.9 (11.7, 12.1)                      | 11.9 (11.4, 12.3)        |
| ≥5 - <10                      | 142          | 9.5 (9.1, 10.0)                    | 9.6 (8.9, 10.2)          | 11.7 (11.4, 12.1)                      | 11.8 (11.2, 12.4)        |
| ≥10                           | 65           | 9.4 (8.7, 10.0)                    | 9.3 (8.5, 10.1)          | 11.6 (11.0, 12.1)                      | 11.7 (11.0, 12.4)        |
|                               |              | P <sub>trend</sub> =0.44           | P <sub>trend</sub> =0.51 | P <sub>trend</sub> =0.47               | P <sub>trend</sub> =0.72 |

<sup>†</sup> Full-term pregnancy was defined as a pregnancy lasting at least six months.

<sup>‡</sup> adjusted for age (continuous) and BMI (continuous) at mammogram

<sup>§</sup> further adjusted for breast cancer in first-degree relative(s), benign breast disease, and use of oral contraceptives, all at or close to mammogram, as well as age at menarche, age at first pregnancy, and BMI at age 18

Supplementary Table 3. Percent mammographic density, dense area, and non-dense area (least square means<sup>†</sup> and 95% confidence intervals) for cumulative average consumption of alcohol before and after first full-term pregnancy<sup>‡</sup> among premenopausal women stratified by BMI at mammogram

| BMI, kg/m <sup>2</sup> | alcohol intake | No. of women | Percent density (%)            | Square root-transformed dense area | Square root-transformed non-dense area |
|------------------------|----------------|--------------|--------------------------------|------------------------------------|----------------------------------------|
| Before first pregnancy |                |              |                                |                                    |                                        |
| <25                    | 0              | 94           | 49.3 (46.3, 52.3)              | 9.9 (9.5, 10.4)                    | 10.1 (9.7, 10.6)                       |
|                        | <5             | 310          | 46.3 (44.6, 48.0)              | 9.6 (9.3, 9.9)                     | 10.4 (10.2, 10.6)                      |
|                        | 5-9            | 86           | 47.0 (43.8, 50.2)              | 9.6 (9.0, 10.1)                    | 10.1 (9.6, 10.5)                       |
|                        | 10             | 50           | 47.6 (43.5, 51.6)              | 9.7 (9.2, 10.2)                    | 10.5 (9.8, 11.1)                       |
|                        |                |              | P <sub>trend</sub> =0.98       | P <sub>trend</sub> =0.80           | P <sub>trend</sub> =0.96               |
| ≥25                    | 0              | 93           | 32.7 (29.2, 36.1)              | 8.8 (8.2, 9.4)                     | 13.2 (12.6, 13.7)                      |
|                        | <5             | 256          | 30.3 (28.6, 32.0)              | 8.8 (8.5, 9.1)                     | 13.7 (13.4, 14.0)                      |
|                        | 5-9            | 67           | 30.7 (27.2, 34.2)              | 8.9 (8.3, 9.5)                     | 13.8 (13.2, 14.4)                      |
|                        | 10             | 30           | 37.0 (31.6, 42.4)              | 10.0 (9.0, 11.1)                   | 13.1 (12.4, 13.8)                      |
|                        |                |              | P <sub>trend</sub> =0.18       | P <sub>trend</sub> =0.05           | P <sub>trend</sub> =0.88               |
|                        |                |              | P <sub>interaction</sub> =0.17 | P <sub>interaction</sub> =0.04     | P <sub>interaction</sub> =0.64         |
| After first pregnancy  |                |              |                                |                                    |                                        |
| <25                    | 0              | 113          | 47.4 (44.7, 50.2)              | 9.7 (9.3, 10.2)                    | 10.3 (9.9, 10.7)                       |
|                        | <5             | 281          | 46.6 (44.9, 48.3)              | 9.6 (9.3, 9.8)                     | 10.3 (10.1, 10.6)                      |
|                        | 5-9            | 89           | 49.2 (45.9, 52.5)              | 9.9 (9.4, 10.4)                    | 10.1 (9.7, 10.6)                       |
|                        | 10             | 46           | 46.0 (41.8, 50.2)              | 9.6 (9.0, 10.2)                    | 10.5 (9.9, 11.1)                       |
|                        |                |              | P <sub>trend</sub> =0.89       | P <sub>trend</sub> =0.79           | P <sub>trend</sub> =0.86               |
| ≥25                    | 0              | 105          | 31.6 (28.5, 34.7)              | 8.7 (8.2, 9.2)                     | 13.3 (12.8, 13.9)                      |
|                        | <5             | 267          | 30.8 (29.1, 32.4)              | 8.9 (8.6, 9.2)                     | 13.7 (13.4, 14.0)                      |
|                        | 5-9            | 53           | 32.2 (28.0, 36.5)              | 9.1 (8.3, 9.9)                     | 13.7 (13.1, 14.4)                      |
|                        | 10             | 19           | 34.5 (28.1, 41.0)              | 9.2 (7.9, 10.6)                    | 12.7 (11.9, 13.5)                      |
|                        |                |              | P <sub>trend</sub> =0.31       | P <sub>trend</sub> =0.38           | P <sub>trend</sub> =0.30               |
|                        |                |              | P <sub>interaction</sub> =0.68 | P <sub>interaction</sub> =0.50     | P <sub>interaction</sub> =0.62         |

<sup>†</sup> adjusted for age (continuous) and BMI (continuous) at mammogram

<sup>‡</sup> Full-term pregnancy was defined as a pregnancy lasting at least six months.

Supplementary Table 4. Percent mammographic density, dense area, and non-dense area (least square means and 95% confidence intervals) by patterns of alcohol consumption, defined by a combination of drinking prior to and after first full-term pregnancy<sup>†</sup>, among premenopausal women.

| Alcohol consumption           |                              | No. of women | Percent density (%)  |                      | Square root-transformed dense area |                      | Square root-transformed non-dense area |                      |
|-------------------------------|------------------------------|--------------|----------------------|----------------------|------------------------------------|----------------------|----------------------------------------|----------------------|
| Before first pregnancy, g/day | After first pregnancy, g/day |              | Model 1 <sup>‡</sup> | Model 2 <sup>§</sup> | Model 1 <sup>‡</sup>               | Model 2 <sup>§</sup> | Model 1 <sup>‡</sup>                   | Model 2 <sup>§</sup> |
| 0                             | 0                            | 133          | 41.7 (38.9, 44.5)    | 41.2 (37.0, 45.3)    | 9.3 (8.9, 9.8)                     | 9.4 (8.6, 10.1)      | 11.4 (11.0, 11.9)                      | 11.5 (10.8, 12.1)    |
| 0                             | >0                           | 52           | 41.4 (37.0, 45.9)    | 42.1 (36.6, 47.5)    | 9.6 (8.8, 10.5)                    | 9.8 (8.8, 10.8)      | 11.7 (11.1, 12.3)                      | 11.6 (10.8, 12.3)    |
| >0                            | 0                            | 85           | 38.1 (34.8, 41.4)    | 37.0 (32.8, 41.3)    | 9.1 (8.5, 9.7)                     | 9.1 (8.3, 9.8)       | 12.0 (11.5, 12.5)                      | 12.1 (11.4, 12.8)    |
| >0-<5                         | >0-<5                        | 389          | 39.3 (37.8, 40.8)    | 39.1 (36.0, 42.3)    | 9.3 (9.0, 9.5)                     | 9.3 (8.8, 9.9)       | 11.9 (11.7, 12.1)                      | 11.9 (11.4, 12.4)    |
| >0-<5                         | ≥5                           | 92           | 39.9 (36.8, 43.1)    | 39.6 (35.7, 43.5)    | 9.3 (8.7, 9.8)                     | 9.3 (8.6, 10.0)      | 11.8 (11.3, 12.2)                      | 11.8 (11.2, 12.4)    |
| ≥5 - <10                      | >0-<5                        | 84           | 38.2 (35.1, 41.2)    | 37.7 (33.7, 41.7)    | 9.1 (8.5, 9.6)                     | 9.1 (9.0, 10.9)      | 11.9 (11.4, 12.4)                      | 11.9 (11.3, 12.5)    |
| ≥5 - <10                      | ≥5 - <10                     | 41           | 41.7 (36.9, 46.5)    | 41.1 (35.6, 46.5)    | 9.9 (9.1, 10.7)                    | 9.9 (9.0, 10.9)      | 12.0 (11.3, 12.8)                      | 12.1 (11.2, 12.9)    |
| ≥10                           | >0-<10                       | 52           | 42.2 (38.2, 46.2)    | 41.8 (37.0, 46.6)    | 9.5 (8.9, 10.1)                    | 9.6 (8.8, 10.4)      | 11.5 (10.9, 12.2)                      | 11.6 (10.8, 12.3)    |
| ≥5                            | ≥10                          | 45           | 40.9 (36.2, 45.5)    | 39.3 (34.1, 44.5)    | 9.4 (8.6, 10.1)                    | 9.3 (8.4, 10.2)      | 11.5 (10.8, 12.2)                      | 11.7 (10.9, 12.5)    |

<sup>†</sup> Full-term pregnancy was defined as a pregnancy lasting at least six months.

<sup>‡</sup> adjusted for age (continuous) and BMI (continuous) at mammogram

<sup>§</sup> further adjusted for breast cancer in first-degree relative(s), benign breast disease, and use of oral contraceptives, all at or close to mammogram, as well as age at menarche, age at first pregnancy, and BMI at age 18
